# Supplementary material
Source: HighWire-hosted journal article supplement (https://oem.bmj.com/content/76/12/895)
Supplement: inline-supplementary-material-1 [file inline-supplementary-material-1.pdf]

**Appendix for the article: ‘Perceived and content-related emotional demands at work and risk of long-term sickness absence in the Danish workforce. A cohort study of 26,410 Danish employees’**

**Appendix 1:** Job group mean scores of emotional demands

**Appendix 1:** Job group mean scores of emotional demands**Table 1\_1:** Job group mean scores of content-related and perceived emotional demands items by job group according to the three digit level of DISCO-08 occupational classification system

| <b>Job group</b> | <b>Job title</b>                                            | <b>Number of participants</b> | <b>Perceived</b> | <b>Content-related</b> |
|------------------|-------------------------------------------------------------|-------------------------------|------------------|------------------------|
| 011              | Commissioned Armed Forces Officers                          | 56                            | 2.77             | 2.88                   |
| 021              | Non-commissioned Armed Forces Officers                      | 48                            | 2.92             | 2.96                   |
| 031              | Armed Forces Occupations, Other Ranks                       | 78                            | 2.68             | 2.78                   |
| 100              | Managers                                                    | 7                             | 3.14             | 2.86                   |
| 111              | Legislators and Senior Officials                            | 53                            | 3.15             | 3.38                   |
| 112              | Managing Directors and Chief Executives                     | 205                           | 2.99             | 3.08                   |
| 120              | Administrative and Commercial Managers                      | 21                            | 2.86             | 2.81                   |
| 121              | Business Services and Administration Managers               | 326                           | 2.83             | 2.99                   |
| 122              | Sales, Marketing and Development Managers                   | 188                           | 2.82             | 2.76                   |
| 131              | Production Managers in Agriculture, Forestry and Fisheries  | 11                            | 2.91             | 3.09                   |
| 132              | Manufacturing, Construction and Distribution Managers       | 160                           | 2.79             | 2.84                   |
| 133              | Information and Communications Technology Services Managers | 44                            | 2.84             | 2.64                   |
| 134              | Professional Services Managers                              | 265                           | 3.05             | 3.54                   |
| 141              | Hotel and Restaurant Managers                               | 5                             | 3.20             | 2.20                   |
| 142              | Retail and Wholesale Trade Managers                         | 78                            | 2.71             | 2.83                   |
| 143              | Other Services Managers                                     | 23                            | 2.83             | 3.17                   |
| 200              | Professionals                                               | 101                           | 2.83             | 2.44                   |
| 211              | Physical and Earth Science Professionals                    | 44                            | 2.61             | 2.59                   |
| 212              | Mathematicians, Actuaries and Statisticians                 | 26                            | 2.96             | 2.00                   |
| 213              | Life Science Professionals                                  | 72                            | 2.85             | 2.44                   |
| 214              | Engineering Professionals (excluding Electrotechnology)     | 575                           | 2.61             | 2.42                   |
| 215              | Electrotechnology Engineers                                 | 86                            | 2.38             | 2.19                   |
| 216              | Architects, Planners, Surveyors and Designers               | 108                           | 2.82             | 2.29                   |
| 220              | Health Professionals                                        | 6                             | 2.33             | 3.67                   |
| 221              | Medical Doctors                                             | 223                           | 3.23             | 4.17                   |
| 222              | Nursing and Midwifery Professionals                         | 992                           | 3.30             | 4.33                   |
| 225              | Veterinarians                                               | 16                            | 3.31             | 2.63                   |
| 226              | Other Health Professionals                                  | 438                           | 3.10             | 3.82                   |

| <b>Job group</b> | <b>Job title</b>                                             | <b>Number of participants</b> | <b>Perceived</b> | <b>Content-related</b> |
|------------------|--------------------------------------------------------------|-------------------------------|------------------|------------------------|
| 230              | Teaching Professionals                                       | 32                            | 3.38             | 4.53                   |
| 231              | University and Higher Education Teachers                     | 359                           | 2.97             | 2.56                   |
| 232              | Vocational Education Teachers                                | 206                           | 3.23             | 3.43                   |
| 233              | Secondary Education Teachers                                 | 266                           | 3.26             | 3.29                   |
| 234              | Primary School and Early Childhood Teachers                  | 1876                          | 3.43             | 3.50                   |
| 235              | Other Teaching Professionals                                 | 645                           | 3.27             | 3.96                   |
| 240              | Business and Administration Professionals                    | 10                            | 2.60             | 2.30                   |
| 241              | Finance Professionals                                        | 511                           | 2.66             | 2.66                   |
| 242              | Administration Professionals                                 | 224                           | 2.80             | 2.80                   |
| 243              | Sales, Marketing and Public Relations Professionals          | 201                           | 2.85             | 2.35                   |
| 251              | Software and Applications Developers and Analysts            | 539                           | 2.55             | 2.17                   |
| 252              | Database and Network Professionals                           | 93                            | 2.46             | 2.19                   |
| 260              | Legal, Social and Cultural Professionals                     | 111                           | 2.85             | 2.41                   |
| 261              | Legal Professionals                                          | 221                           | 2.66             | 2.73                   |
| 262              | Librarians, Archivists and Curators                          | 70                            | 2.96             | 2.83                   |
| 263              | Social and Religious Professionals                           | 392                           | 3.19             | 3.77                   |
| 264              | Authors, Journalists and Linguists                           | 157                           | 2.90             | 2.64                   |
| 265              | Creative and Performing Artists                              | 55                            | 3.29             | 2.84                   |
| 300              | Technicians and Associate Professionals                      | 13                            | 2.54             | 2.77                   |
| 311              | Physical and Engineering Science Technicians                 | 705                           | 2.57             | 2.53                   |
| 312              | Manufacturing and Construction Supervisors                   | 16                            | 2.38             | 2.69                   |
| 313              | Process Control Technicians                                  | 41                            | 2.73             | 2.41                   |
| 314              | Life Science Technicians and Related Associate Professionals | 28                            | 2.71             | 2.39                   |
| 315              | Ship and Aircraft Controllers and Technicians                | 68                            | 2.44             | 2.26                   |
| 321              | Medical and Pharmaceutical Technicians                       | 211                           | 2.95             | 3.61                   |
| 322              | Nursing and Midwifery Associate Professionals                | 9                             | 2.89             | 3.89                   |
| 324              | Veterinary Technicians and Assistants                        | 6                             | 2.67             | 3.00                   |
| 325              | Other Health Associate Professionals                         | 114                           | 2.79             | 3.27                   |
| 330              | Business and Administration Associate Professionals          | 22                            | 2.95             | 2.64                   |
| 331              | Financial and Mathematical Associate Professionals           | 450                           | 2.58             | 2.51                   |

| <b>Job group</b> | <b>Job title</b>                                                                  | <b>Number of participants</b> | <b>Perceived</b> | <b>Content-related</b> |
|------------------|-----------------------------------------------------------------------------------|-------------------------------|------------------|------------------------|
| 332              | Sales and Purchasing Agents and Brokers                                           | 537                           | 2.76             | 2.42                   |
| 333              | Business Services Agents                                                          | 182                           | 2.86             | 2.75                   |
| 334              | Administrative and Specialized Secretaries                                        | 613                           | 2.82             | 3.19                   |
| 335              | Government regulatory associate professionals                                     | 171                           | 2.70             | 2.84                   |
| 341              | Legal, Social and Religious Associate Professionals                               | 154                           | 3.20             | 3.31                   |
| 342              | Sports and Fitness Workers                                                        | 27                            | 3.07             | 2.74                   |
| 343              | Artistic, Cultural and Culinary Associate Professionals                           | 85                            | 3.02             | 2.75                   |
| 351              | Information and Communications Technology Operations and User Support Technicians | 112                           | 2.54             | 2.38                   |
| 352              | Telecommunications and Broadcasting Technicians                                   | 63                            | 2.87             | 2.56                   |
| 400              | Clerical Support Workers                                                          | 110                           | 2.85             | 2.83                   |
| 411              | General Office Clerks                                                             | 1129                          | 2.71             | 2.78                   |
| 412              | Secretaries (general)                                                             | 116                           | 2.68             | 2.70                   |
| 413              | Keyboard Operators                                                                | 60                            | 2.62             | 2.33                   |
| 421              | Tellers. Money Collectors and Related Clerks                                      | 48                            | 2.56             | 3.02                   |
| 422              | Client Information Workers                                                        | 215                           | 2.91             | 2.78                   |
| 431              | Numerical Clerks                                                                  | 272                           | 2.61             | 2.62                   |
| 432              | Material recording and Transport Clerks                                           | 209                           | 2.54             | 2.42                   |
| 441              | Other Clerical Support Workers                                                    | 296                           | 2.64             | 2.55                   |
| 500              | Service and Sales Workers                                                         | 5                             | 2.60             | 3.20                   |
| 511              | Travel Attendants, Conductors and Guides                                          | 50                            | 2.72             | 3.02                   |
| 512              | Cooks                                                                             | 85                            | 2.74             | 2.44                   |
| 513              | Waiters and Bartenders                                                            | 80                            | 2.79             | 2.33                   |
| 514              | Hairdressers. Beauticians and Related Workers                                     | 35                            | 3.29             | 3.60                   |
| 515              | Building and Housekeeping Supervisors                                             | 268                           | 2.78             | 3.20                   |
| 516              | Other Personal Services Workers                                                   | 38                            | 2.47             | 3.03                   |
| 522              | Shop Salespersons                                                                 | 725                           | 2.60             | 2.43                   |
| 523              | Cashiers and Ticket Clerks                                                        | 241                           | 2.51             | 2.57                   |
| 524              | Other Sales Workers                                                               | 223                           | 2.66             | 2.32                   |
| 531              | Child Care Workers and Teachers' Aides                                            | 648                           | 3.27             | 3.21                   |
| 532              | Personal Care Workers in Health Services                                          | 1391                          | 3.22             | 4.13                   |
| 541              | Protective Services Workers                                                       | 255                           | 2.79             | 3.67                   |
| 611              | Market Gardeners and Crop Growers                                                 | 97                            | 2.74             | 2.99                   |

| <b>Job group</b> | <b>Job title</b>                                                             | <b>Number of participants</b> | <b>Perceived</b> | <b>Content-related</b> |
|------------------|------------------------------------------------------------------------------|-------------------------------|------------------|------------------------|
| 612              | Animal Producers                                                             | 32                            | 2.69             | 2.56                   |
| 613              | Mixed Crop and Animal Producers                                              | 18                            | 2.28             | 2.22                   |
| 621              | Forestry and Related Workers                                                 | 8                             | 2.88             | 3.00                   |
| 700              | Craft and Related Trades Workers                                             | 38                            | 2.47             | 2.47                   |
| 710              | Building and Related Trades Workers (excluding Electricians)                 | 32                            | 2.59             | 2.97                   |
| 711              | Building Frame and Related Trades Workers                                    | 335                           | 2.27             | 2.36                   |
| 712              | Building Finishers and Related Trades Workers                                | 129                           | 2.42             | 2.43                   |
| 713              | Painters, Building Structure Cleaners and Related Trades Workers             | 114                           | 2.50             | 2.35                   |
| 720              | Metal, Machinery and Related Trades Workers                                  | 9                             | 2.22             | 2.56                   |
| 721              | Sheet and Structural Metal Workers, Moulders and Welders and Related Workers | 133                           | 2.26             | 2.44                   |
| 722              | Blacksmiths, Toolmakers and Related Trades Workers                           | 307                           | 2.36             | 2.56                   |
| 723              | Machinery Mechanics and Repairers                                            | 249                           | 2.38             | 2.53                   |
| 731              | Handicraft Workers                                                           | 12                            | 2.58             | 2.33                   |
| 732              | Printing Trades Workers                                                      | 50                            | 2.54             | 2.24                   |
| 741              | Electrical Equipment Installers and Repairers                                | 272                           | 2.42             | 2.49                   |
| 742              | Electronics and Telecommunications Installers and Repairers                  | 34                            | 2.53             | 2.47                   |
| 751              | Food Processing and Related Trades Workers                                   | 120                           | 2.54             | 2.50                   |
| 752              | Wood Treaters, Cabinet-makers and Related Trades Workers                     | 38                            | 2.66             | 2.53                   |
| 753              | Garment and Related Trades Workers                                           | 15                            | 3.07             | 2.87                   |
| 754              | Other Craft and Related Workers                                              | 30                            | 2.97             | 2.60                   |
| 800              | Plant and Machine Operators and Assemblers                                   | 5                             | 3.40             | 3.20                   |
| 811              | Mineral Processing Plant Operators                                           | 30                            | 2.60             | 2.60                   |
| 812              | Metal Processing and Finishing Plant Operators                               | 77                            | 2.38             | 2.69                   |
| 813              | Chemical and Photographic Products Plant and Machine Operators               | 33                            | 2.55             | 2.42                   |
| 814              | Rubber, Plastic and Paper Products Machine Operators                         | 86                            | 2.47             | 2.74                   |
| 815              | Textile, Fur and Leather Products Machine Operators                          | 19                            | 2.32             | 2.74                   |
| 816              | Food and Related Products Machine                                            | 143                           | 2.38             | 2.60                   |

| <b>Job group</b> | <b>Job title</b>                                         | <b>Number of participants</b> | <b>Perceived</b> | <b>Content-related</b> |
|------------------|----------------------------------------------------------|-------------------------------|------------------|------------------------|
| 817              | Wood Processing and Papermaking Plant Operators          | 55                            | 2.42             | 2.53                   |
| 818              | Other Stationary Plant and Machine Operators             | 100                           | 2.36             | 2.68                   |
| 820              | Assemblers                                               | 24                            | 2.38             | 2.50                   |
| 821              | Assemblers                                               | 171                           | 2.55             | 2.64                   |
| 831              | Locomotive Engine Drivers and Related Workers            | 39                            | 2.49             | 2.56                   |
| 832              | Car, Van and Motorcycle Drivers                          | 54                            | 2.48             | 2.43                   |
| 833              | Heavy Truck and Bus Drivers                              | 352                           | 2.44             | 2.56                   |
| 834              | Mobile Plant Operators                                   | 74                            | 2.19             | 2.69                   |
| 835              | Ships' Deck Crews and Related Workers                    | 12                            | 2.17             | 2.83                   |
| 910              | Cleaners and Helpers                                     | 15                            | 2.33             | 2.40                   |
| 911              | Domestic, Hotel and Office Cleaners and Helpers          | 466                           | 2.75             | 2.86                   |
| 912              | Vehicle, Window, Laundry and Other Hand Cleaning Workers | 29                            | 2.48             | 2.66                   |
| 921              | Agricultural, Forestry and Fishery Labourers             | 20                            | 2.65             | 2.60                   |
| 931              | Construction Labourers                                   | 333                           | 2.44             | 2.63                   |
| 932              | Manufacturing Labourers                                  | 176                           | 2.36             | 2.46                   |
| 933              | Transport and Storage Labourers                          | 300                           | 2.42             | 2.54                   |
| 941              | Food Preparation Assistants                              | 218                           | 2.77             | 2.94                   |
| 961              | Refuse Workers                                           | 29                            | 2.41             | 2.48                   |
| 962              | Other Elementary Workers                                 | 89                            | 2.47             | 2.38                   |
| 999              | No valid information available                           | 1012                          | 2.68             | 2.69                   |
